# Supplementary material for: Pathogen community composition and co-infection patterns in a wild community of rodents
Source: bioRxiv or medRxiv preprint supplement (doi:10.1101/2020.02.09.940494), 2023-11-14
Supplement: Supplementary file [file media-2.pdf]

Supplementary Materials Table S1. Catalogue of bacterial genera from splenic tissue in all rodents sampled. Table includes only genera deemed positive in at least one animal. OTU = operational taxonomic unit ; NC = negative controls ; Bold genera include OTUs deemed potentially pathogenic ; % reads in positive animals = Nb reads - NCs - Nb reads in animals not meeting criteria for positive infection (specified in the main text).

| Phylum           | Class          | (sub-)Order                       | Family                               | Genus                                   | Minimum Bootstrap                       | Biology                                                                                                                                                                                                                                                                                                                                                                                                                                                                                                                                                                                                                                                   | Nb of OTUs | Total Nb Reads (incl. NCs)     | % reads in NC | Nb Positive Infections | % Reads in Positive Animals |      |
|------------------|----------------|-----------------------------------|--------------------------------------|-----------------------------------------|-----------------------------------------|-----------------------------------------------------------------------------------------------------------------------------------------------------------------------------------------------------------------------------------------------------------------------------------------------------------------------------------------------------------------------------------------------------------------------------------------------------------------------------------------------------------------------------------------------------------------------------------------------------------------------------------------------------------|------------|--------------------------------|---------------|------------------------|-----------------------------|------|
| Acidobacteria    | Acidobacteria  | Acidobacteriales                  | Acidobacteriaceae                    | <i>unclassified Acidobacteriaceae</i>   | 100                                     | Common soil microbes, known contaminant of molecular biology reagents.                                                                                                                                                                                                                                                                                                                                                                                                                                                                                                                                                                                    | 1          | 53                             | 0             | 1                      | 38 %                        |      |
|                  |                | Pseudonocardiales                 | Pseudonocardaceae                    | <i>Pseudonocardia</i>                   | 79                                      |                                                                                                                                                                                                                                                                                                                                                                                                                                                                                                                                                                                                                                                           | 1          | 344                            | 0             | 1                      | 14 %                        |      |
| Actinobacteria   | Actinobacteria | Bifidobacteriales                 | Bifidobacteriaceae                   | <i>Bifidobacterium</i>                  | 100                                     | Long thought to be fungi, most are soil or aquatic microbes. Some can cause opportunistic infections in humans, such as <i>Corynebacterium</i> , <i>Dietzia</i> and <i>Williamsia</i> species. <i>Mycobacteria</i> in the sub-order Corynebacteriales are pathogens that cause tuberculosis and leprosy in humans and other mammals, and one species of <i>Rhodococcus</i> is an important pathogen of young horses. However, many of these have also been recognized as common contaminants of molecular biology equipment and reagents (indicated here with an asterisk *).                                                                             | 2          | 649                            | 0             | 5                      | 28 %                        |      |
|                  |                |                                   | Corynebacteriaceae                   | <b><i>Corynebacterium</i></b> *         | 100                                     |                                                                                                                                                                                                                                                                                                                                                                                                                                                                                                                                                                                                                                                           | 1          | 1853                           | 0             | 3                      | 32 %                        |      |
|                  |                | Corynebacteriales                 | Dietziaceae                          | <b><i>Dietzia</i></b> *                 | 100                                     |                                                                                                                                                                                                                                                                                                                                                                                                                                                                                                                                                                                                                                                           | 1          | 2553                           | 0             | 9                      | 98 %                        |      |
|                  |                |                                   | Nocardiaceae                         | <i>Rhodococcus</i> *                    | 100                                     |                                                                                                                                                                                                                                                                                                                                                                                                                                                                                                                                                                                                                                                           | 1          | 240                            | 0             | 2                      | 47 %                        |      |
|                  |                |                                   | <b><i>Williamsia</i></b>             | 100                                     | 1                                       |                                                                                                                                                                                                                                                                                                                                                                                                                                                                                                                                                                                                                                                           | 274        | 0                              | 2             | 54 %                   |                             |      |
|                  |                | Micrococcales                     | Brevibacteriaceae                    | <i>Brevibacterium</i> *                 | 100                                     |                                                                                                                                                                                                                                                                                                                                                                                                                                                                                                                                                                                                                                                           | 1          | 1251                           | 0             | 6                      | 33 %                        |      |
|                  |                |                                   | Dermabacteraceae                     | <i>Brachybacterium</i> *                | 100                                     |                                                                                                                                                                                                                                                                                                                                                                                                                                                                                                                                                                                                                                                           | 1          | 4787                           | 0             | 9                      | 94 %                        |      |
|                  |                |                                   | Microbacteriaceae                    | <i>Microbacterium</i> *                 | 80                                      |                                                                                                                                                                                                                                                                                                                                                                                                                                                                                                                                                                                                                                                           | 1          | 392                            | 6.12 %        | 1                      | 8 %                         |      |
|                  |                |                                   | Micrococcaceae                       | <i>Kocuria</i>                          | 63                                      |                                                                                                                                                                                                                                                                                                                                                                                                                                                                                                                                                                                                                                                           | 1          | 632                            | 0             | 4                      | 22 %                        |      |
|                  |                | Coriobacteria                     | Propionibacteriales                  | Nocardoidaceae                          | <i>Marmoricola</i>                      |                                                                                                                                                                                                                                                                                                                                                                                                                                                                                                                                                                                                                                                           | 91         | 1                              | 329           | 0                      | 1                           | 5 %  |
|                  |                |                                   |                                      | Coriobacteriaceae                       | <i>Adlercreutzia</i>                    |                                                                                                                                                                                                                                                                                                                                                                                                                                                                                                                                                                                                                                                           | 100        | 1                              | 139           | 0                      | 2                           | 36 % |
|                  |                |                                   | Coriobacteriales                     | <i>Enterorhabdus</i>                    | 100                                     |                                                                                                                                                                                                                                                                                                                                                                                                                                                                                                                                                                                                                                                           | 1          | 127                            | 0             | 1                      | 10 %                        |      |
|                  |                |                                   |                                      | <i>unclassified Coriobacteriaceae</i>   | 100                                     |                                                                                                                                                                                                                                                                                                                                                                                                                                                                                                                                                                                                                                                           | 3          | 878                            | 0             | 8                      | 60 %                        |      |
|                  |                |                                   |                                      | <i>unclassified Coriobacteriaceae</i>   | 100                                     |                                                                                                                                                                                                                                                                                                                                                                                                                                                                                                                                                                                                                                                           | 3          | 878                            | 0             | 8                      | 60 %                        |      |
| Bacteroidetes    | Bacteroidia    | Bacteroidales                     | Bacteroidaceae                       | <i>Bacteroides</i>                      | 100                                     | Most are normal flora or environmental microbes, rarely associated with opportunistic infections (e.g., <i>Prevotella</i> species can cause infection from animal bites). The Flavobacteriaceae family includes a number of important fish pathogens, some respiratory pathogens of birds, and more recently discovered isolates from human sewage and clinical specimens (such as <i>Elizabethkingia meningoseptica</i> ). One rodent respiratory pathogen has been recently described ( <i>Filobacterium rodentium</i> gen. nov., sp. nov.) but was not found here.                                                                                     | 5          | 581                            | 0             | 7                      | 70 %                        |      |
|                  |                |                                   | <i>unclassified Bacteroidales</i>    | 98                                      | 110                                     |                                                                                                                                                                                                                                                                                                                                                                                                                                                                                                                                                                                                                                                           | 33495      | 0                              | 283           | 68 %                   |                             |      |
|                  |                |                                   | Homeothermaceae                      | <i>Candidatus Homeothermaceae</i>       | 100                                     |                                                                                                                                                                                                                                                                                                                                                                                                                                                                                                                                                                                                                                                           | 1          | 153                            | 0             | 1                      | 30 %                        |      |
|                  |                | Porphyromonadaceae                | Odoribacter                          | 100                                     | 5                                       |                                                                                                                                                                                                                                                                                                                                                                                                                                                                                                                                                                                                                                                           | 999        | 0                              | 5             | 94 %                   |                             |      |
|                  |                |                                   | Prevotellaceae                       | <i>Prevotella</i>                       | 100                                     |                                                                                                                                                                                                                                                                                                                                                                                                                                                                                                                                                                                                                                                           | 6          | 2967                           | 0             | 11                     | 77 %                        |      |
|                  |                | Rikenellaceae                     | <i>Alistipes</i>                     | 100                                     | 4                                       |                                                                                                                                                                                                                                                                                                                                                                                                                                                                                                                                                                                                                                                           | 885        | < 1 %                          | 6             | 60 %                   |                             |      |
|                  |                |                                   | <i>Rikenella</i>                     | 100                                     | 1                                       |                                                                                                                                                                                                                                                                                                                                                                                                                                                                                                                                                                                                                                                           | 65         | 0                              | 1             | 65 %                   |                             |      |
|                  |                | <i>unclassified Bacteroidales</i> | <i>unclassified Bacteroidales</i>    | 94                                      | 4                                       |                                                                                                                                                                                                                                                                                                                                                                                                                                                                                                                                                                                                                                                           | 997        | 0                              | 9             | 73 %                   |                             |      |
|                  |                |                                   | <i>unclassified Bacteroidales</i>    | 100                                     | 1                                       |                                                                                                                                                                                                                                                                                                                                                                                                                                                                                                                                                                                                                                                           | 264        | 0                              | 1             | 31 %                   |                             |      |
|                  |                | Flavobacteria                     | Flavobacteriales                     | Flavobacteriaceae                       | <i>Chryseobacterium</i>                 |                                                                                                                                                                                                                                                                                                                                                                                                                                                                                                                                                                                                                                                           | 100        | 1                              | 438           | 0                      | 2                           | 36 % |
|                  |                |                                   |                                      | <i>Cloacibacterium</i>                  | 100                                     |                                                                                                                                                                                                                                                                                                                                                                                                                                                                                                                                                                                                                                                           | 1          | 2760                           | 0             | 2                      | 2 %                         |      |
|                  |                |                                   |                                      | <i>Flavobacterium</i>                   | 100                                     |                                                                                                                                                                                                                                                                                                                                                                                                                                                                                                                                                                                                                                                           | 1          | 673                            | 0             | 3                      | 46 %                        |      |
|                  |                |                                   |                                      | <i>unclassified Flavobacteriaceae</i>   | 100                                     |                                                                                                                                                                                                                                                                                                                                                                                                                                                                                                                                                                                                                                                           | 3          | 668                            | 0             | 4                      | 86 %                        |      |
|                  |                | Sphingobacteria                   | Sphingobacteriales                   | Chitinophagaceae                        | <i>Sediminibacterium</i>                |                                                                                                                                                                                                                                                                                                                                                                                                                                                                                                                                                                                                                                                           | 100        | 1                              | 10426         | 7.6 %                  | 1                           | 4 %  |
|                  |                |                                   |                                      | Sphingobacteriaceae                     | <i>Pedobacter</i> *                     |                                                                                                                                                                                                                                                                                                                                                                                                                                                                                                                                                                                                                                                           | 92         | 2                              | 531           | 0                      | 2                           | 75 % |
|                  |                |                                   |                                      | <i>Sphingobacterium</i>                 | 100                                     |                                                                                                                                                                                                                                                                                                                                                                                                                                                                                                                                                                                                                                                           | 1          | 80                             | 0             | 1                      | 20 %                        |      |
|                  |                |                                   |                                      | <i>unclassified Sphingobacteriaceae</i> | 69                                      |                                                                                                                                                                                                                                                                                                                                                                                                                                                                                                                                                                                                                                                           | 1          | 341                            | 0             | 2                      | 27 %                        |      |
|                  |                | <i>unclassified Bacteroidetes</i> | 100                                  | 3                                       | 1074                                    |                                                                                                                                                                                                                                                                                                                                                                                                                                                                                                                                                                                                                                                           | 0          | 9                              | 73 %          |                        |                             |      |
|                  |                | Cyanobacteria                     | Melainabacteria                      | Gastranaerophilales                     | <i>unclassified Gastranaerophilales</i> |                                                                                                                                                                                                                                                                                                                                                                                                                                                                                                                                                                                                                                                           | 100        | Most likely natural gut flora. | 1             | 202                    | 0                           | 3    |
| Firmicutes       | Bacilli        | Bacillales                        | Bacillaceae                          | <i>Geobacillus</i>                      | 99                                      | While most Firmicutes species are abundant in normal flora or environmental samples, a number are associated with important diseases and opportunistic infections in animals and humans (nasopharyngeal diseases from <i>Streptococcus</i> spp. infections; among the <i>Bacillales</i> : anthrax from infection by <i>Bacillus anthracis</i> , and Listeriosis disease of the central nervous system from <i>Listeria</i> species; <i>Clostridium</i> species infections are probably the most abundant, with clinical relevancy for cases of tetanus, botulism and food poisoning, gangrene, and for diarrhea in patients following antibiotic therapy. | 1          | 306                            | 0             | 1                      | 13 %                        |      |
|                  |                |                                   | Listeriaceae                         | <i>Brochothrix</i>                      | 100                                     |                                                                                                                                                                                                                                                                                                                                                                                                                                                                                                                                                                                                                                                           | 1          | 379                            | 0             | 1                      | 10 %                        |      |
|                  |                |                                   | <i>unclassified Bacillales</i>       | <i>unclassified Bacillales</i>          | 90                                      |                                                                                                                                                                                                                                                                                                                                                                                                                                                                                                                                                                                                                                                           | 3          | 1651                           | 0             | 4                      | 30 %                        |      |
|                  |                | Lactobacillales                   | Carnobacteriaceae                    | <i>Trichococcus</i>                     | 59                                      |                                                                                                                                                                                                                                                                                                                                                                                                                                                                                                                                                                                                                                                           | 1          | 53                             | 0             | 1                      | 43 %                        |      |
|                  |                |                                   | Enterococcaceae                      | <i>Enterococcus</i>                     | 59                                      |                                                                                                                                                                                                                                                                                                                                                                                                                                                                                                                                                                                                                                                           | 1          | 355                            | 0             | 2                      | 29 %                        |      |
|                  |                |                                   | Lactobacillaceae                     | <i>Lactobacillus</i>                    | 96                                      |                                                                                                                                                                                                                                                                                                                                                                                                                                                                                                                                                                                                                                                           | 5          | 7645                           | 0             | 30                     | 76 %                        |      |
|                  |                |                                   | <i>unclassified Lactobacillaceae</i> | 75                                      | 1                                       |                                                                                                                                                                                                                                                                                                                                                                                                                                                                                                                                                                                                                                                           | 265        | 0                              | 2             | 20 %                   |                             |      |
|                  |                | Leuconostocaceae                  | <i>Leuconostoc</i>                   | 100                                     | 1                                       |                                                                                                                                                                                                                                                                                                                                                                                                                                                                                                                                                                                                                                                           | 862        | 0                              | 2             | 57 %                   |                             |      |
|                  |                | Streptococcaceae                  | <i>Lactococcus</i>                   | 100                                     | 1                                       |                                                                                                                                                                                                                                                                                                                                                                                                                                                                                                                                                                                                                                                           | 5499       | 0                              | 3             | 12 %                   |                             |      |
|                  |                | Clostridia                        | Clostridiales                        | Anaerococcus                            | <b><i>Streptococcus</i></b>             |                                                                                                                                                                                                                                                                                                                                                                                                                                                                                                                                                                                                                                                           | 98         | 5                              | 2604          | 0                      | 16                          | 72 % |
|                  |                |                                   |                                      | <i>Anaerococcus</i>                     | 100                                     |                                                                                                                                                                                                                                                                                                                                                                                                                                                                                                                                                                                                                                                           | 1          | 147                            | 0             | 1                      | 86 %                        |      |
|                  |                |                                   |                                      | <i>Candidatus Arthromitus</i>           | 100                                     |                                                                                                                                                                                                                                                                                                                                                                                                                                                                                                                                                                                                                                                           | 1          | 98                             | 0             | 1                      | 93 %                        |      |
|                  |                |                                   |                                      | <i>Clostridium sensu stricto 12</i>     | 97                                      |                                                                                                                                                                                                                                                                                                                                                                                                                                                                                                                                                                                                                                                           | 1          | 59                             | 0             | 1                      | 56 %                        |      |
|                  |                |                                   |                                      | <i>Incertae sedis</i>                   | 100                                     |                                                                                                                                                                                                                                                                                                                                                                                                                                                                                                                                                                                                                                                           | 1          | 68                             | 0             | 2                      | 62 %                        |      |
|                  |                |                                   |                                      | <i>unclassified Defluviitaleaceae</i>   | 100                                     |                                                                                                                                                                                                                                                                                                                                                                                                                                                                                                                                                                                                                                                           | 1          | 189                            | 0             | 1                      | 38 %                        |      |
|                  |                |                                   |                                      | Defluviitaleaceae                       | <i>Defluviitaleaceae</i>                |                                                                                                                                                                                                                                                                                                                                                                                                                                                                                                                                                                                                                                                           | 82         | 5                              | 1676          | 0                      | 19                          | 64 % |
|                  |                |                                   |                                      | Lachnospiraceae                         | <i>Acetatifactor</i>                    |                                                                                                                                                                                                                                                                                                                                                                                                                                                                                                                                                                                                                                                           | 100        | 1                              | 87            | 0                      | 1                           | 23 % |
|                  |                |                                   |                                      | <i>Anaerostipes</i>                     | 51                                      |                                                                                                                                                                                                                                                                                                                                                                                                                                                                                                                                                                                                                                                           | 19         | 10445                          | 0             | 81                     | 64 %                        |      |
|                  |                |                                   |                                      | <i>Blautia</i>                          | 69                                      |                                                                                                                                                                                                                                                                                                                                                                                                                                                                                                                                                                                                                                                           | 1          | 64                             | 0             | 1                      | 28 %                        |      |
|                  |                |                                   |                                      | <i>Dorea</i>                            | 70                                      |                                                                                                                                                                                                                                                                                                                                                                                                                                                                                                                                                                                                                                                           | 1          | 68                             | 0             | 1                      | 28 %                        |      |
|                  |                | <i>Incertae sedis</i>             | 66                                   | 6                                       | 1381                                    |                                                                                                                                                                                                                                                                                                                                                                                                                                                                                                                                                                                                                                                           | 0          | 12                             | 62 %          |                        |                             |      |
| <i>Roseburia</i> | 66             | 6                                 | 1381                                 | 0                                       | 12                                      | 62 %                                                                                                                                                                                                                                                                                                                                                                                                                                                                                                                                                                                                                                                      |            |                                |               |                        |                             |      |

| Phylum             | Class                   | (sub-)Order                     | Family                  | Genus                                  | Minimum Bootstrap  | Biology                                                                                                                                                                                                                                                   | Nb of OTUs              | Total Nb Reads (incl. NCs)         | % reads in NC                                                                                                                                                                                                  | Nb Positive Infections                                                                                                                                                                                                                       | % Reads in Positive Animals |        |       |      |      |
|--------------------|-------------------------|---------------------------------|-------------------------|----------------------------------------|--------------------|-----------------------------------------------------------------------------------------------------------------------------------------------------------------------------------------------------------------------------------------------------------|-------------------------|------------------------------------|----------------------------------------------------------------------------------------------------------------------------------------------------------------------------------------------------------------|----------------------------------------------------------------------------------------------------------------------------------------------------------------------------------------------------------------------------------------------|-----------------------------|--------|-------|------|------|
| Firmicutes (cont.) |                         |                                 |                         | <i>unclassified Lachnospiraceae</i>    | 52                 |                                                                                                                                                                                                                                                           | 72                      | 23886                              | 0                                                                                                                                                                                                              | 189                                                                                                                                                                                                                                          | 68 %                        |        |       |      |      |
|                    |                         |                                 | Peptostreptococcaceae   | <i>Incertae sedis</i>                  | 100                |                                                                                                                                                                                                                                                           | 1                       | 161                                | 0                                                                                                                                                                                                              | 1                                                                                                                                                                                                                                            | 52 %                        |        |       |      |      |
|                    |                         |                                 | Ruminococcaceae         | <i>Anaerotruncus</i>                   | 77                 |                                                                                                                                                                                                                                                           | 1                       | 98                                 | 0                                                                                                                                                                                                              | 2                                                                                                                                                                                                                                            | 40 %                        |        |       |      |      |
|                    |                         |                                 |                         | <i>Faecalibacterium</i>                | 100                |                                                                                                                                                                                                                                                           | 1                       | 356                                | 0                                                                                                                                                                                                              | 2                                                                                                                                                                                                                                            | 93 %                        |        |       |      |      |
|                    |                         |                                 |                         | <i>Incertae sedis</i>                  | 57                 |                                                                                                                                                                                                                                                           | 5                       | 1892                               | 0                                                                                                                                                                                                              | 21                                                                                                                                                                                                                                           | 61 %                        |        |       |      |      |
|                    |                         |                                 |                         | <i>Intestinimonas</i>                  | 79                 |                                                                                                                                                                                                                                                           | 3                       | 618                                | 0                                                                                                                                                                                                              | 6                                                                                                                                                                                                                                            | 25 %                        |        |       |      |      |
|                    |                         |                                 |                         | <i>Oscillibacter</i>                   | 83                 |                                                                                                                                                                                                                                                           | 4                       | 2081                               | < 0.1 %                                                                                                                                                                                                        | 19                                                                                                                                                                                                                                           | 55 %                        |        |       |      |      |
|                    |                         |                                 |                         | <i>Ruminococcus</i>                    | 89                 |                                                                                                                                                                                                                                                           | 11                      | 3779                               | < 1 %                                                                                                                                                                                                          | 34                                                                                                                                                                                                                                           | 70 %                        |        |       |      |      |
|                    |                         |                                 |                         | <i>unclassified Ruminococcaceae</i>    | 59                 |                                                                                                                                                                                                                                                           | 24                      | 16720                              | 0                                                                                                                                                                                                              | 116                                                                                                                                                                                                                                          | 74 %                        |        |       |      |      |
|                    |                         |                                 |                         | <i>unclassified Clostridiales</i>      | 72                 |                                                                                                                                                                                                                                                           | 13                      | 2560                               | 0                                                                                                                                                                                                              | 32                                                                                                                                                                                                                                           | 57 %                        |        |       |      |      |
|                    |                         |                                 | vadinBB60               | <i>Clostridiales</i>                   | 100                |                                                                                                                                                                                                                                                           | 2                       | 9590                               | 0                                                                                                                                                                                                              | 32                                                                                                                                                                                                                                           | 82 %                        |        |       |      |      |
|                    |                         |                                 |                         | <i>vadinBB60</i> genus                 | 100                |                                                                                                                                                                                                                                                           | 2                       | 956                                | 0                                                                                                                                                                                                              | 8                                                                                                                                                                                                                                            | 72 %                        |        |       |      |      |
|                    |                         |                                 |                         | <i>unclassified Clostridiales</i>      | 100                |                                                                                                                                                                                                                                                           | 2                       | 956                                | 0                                                                                                                                                                                                              | 8                                                                                                                                                                                                                                            | 72 %                        |        |       |      |      |
|                    |                         |                                 | unclassified Clostridia | <i>unclassified Clostridia</i>         | 100                |                                                                                                                                                                                                                                                           | 1                       | 516                                | 0                                                                                                                                                                                                              | 2                                                                                                                                                                                                                                            | 27 %                        |        |       |      |      |
|                    |                         | Erysipelotrichia                | Erysipelotrichales      | Erysipelotrichaceae                    | <i>Allobaculum</i> | 99                                                                                                                                                                                                                                                        |                         | 2                                  | 911                                                                                                                                                                                                            | 0                                                                                                                                                                                                                                            | 6                           | 90 %   |       |      |      |
|                    |                         | Erysipelotrichales              |                         | <i>Catenibacterium</i>                 | 100                |                                                                                                                                                                                                                                                           | 1                       | 256                                | 0                                                                                                                                                                                                              | 1                                                                                                                                                                                                                                            | 96 %                        |        |       |      |      |
|                    | Negativicutes           | Selenomonadales                 | Acidaminococcaceae      | <i>Phascolarctobacterium</i>           | 100                |                                                                                                                                                                                                                                                           | 1                       | 157                                | 0                                                                                                                                                                                                              | 2                                                                                                                                                                                                                                            | 83 %                        |        |       |      |      |
|                    |                         | Selenomonadales                 | Veillonellaceae         | <i>Veillonella</i>                     | 100                |                                                                                                                                                                                                                                                           | 1                       | 268                                | 0                                                                                                                                                                                                              | 1                                                                                                                                                                                                                                            | 24 %                        |        |       |      |      |
|                    | unclassified Firmicutes |                                 |                         | <i>unclassified Firmicutes</i>         | 100                |                                                                                                                                                                                                                                                           | 1                       | 53                                 | 0                                                                                                                                                                                                              | 1                                                                                                                                                                                                                                            | 49 %                        |        |       |      |      |
| Fusobacteria       | Fusobacteria            | Fusobacteriales                 | Fusobacteriaceae        | <b>Fusobacterium</b>                   | 100                | Fusobacterium species are associated with a range of gastro-intestinal diseases and skin ulcerations, but it is not clear to what degree this association is opportunistic.                                                                               | 1                       | 108                                | 0                                                                                                                                                                                                              | 2                                                                                                                                                                                                                                            | 94 %                        |        |       |      |      |
| Proteobacteria     | Alphaproteobacteria     | Caulobacterales                 | Caulobacteraceae        | <i>Brevundimonas</i>                   | 100                | Many <i>Proteobacteria</i> are important animal pathogens, including those with sustained zoonotic transmission to humans.                                                                                                                                | 1                       | 275                                | 0                                                                                                                                                                                                              | 1                                                                                                                                                                                                                                            | 28 %                        |        |       |      |      |
|                    |                         |                                 |                         |                                        | Rhizobiales        | Bartonellaceae                                                                                                                                                                                                                                            | <b>Bartonella</b>       | 100                                | <i>Bartonella</i> species are thought to have undergone a recent expansion and now commonly infect rodent species around the world. Many of these species are implicated in causing zoonotic human infections. | 1                                                                                                                                                                                                                                            | 6327077                     | 0.01   | 245   | 99%  |      |
|                    |                         |                                 |                         |                                        |                    | Methylbacteriaceae                                                                                                                                                                                                                                        | <i>Methylbacterium*</i> | 100                                |                                                                                                                                                                                                                | 2                                                                                                                                                                                                                                            | 7113                        | 1.8 %  | 4     | 7 %  |      |
|                    |                         |                                 |                         |                                        |                    | Phyllobacteriaceae                                                                                                                                                                                                                                        | <i>Phyllobacterium</i>  | 70                                 | The remaining <i>Rhizobiales</i> and <i>Rhodobacteriales</i> are important soil microbes.                                                                                                                      | 1                                                                                                                                                                                                                                            | 120                         | 0      | 1     | 39 % |      |
|                    |                         |                                 |                         |                                        |                    | Rhizobiaceae                                                                                                                                                                                                                                              | <i>Rhizobium</i>        | 100                                |                                                                                                                                                                                                                | 1                                                                                                                                                                                                                                            | 968                         | 1.96 % | 1     | 40 % |      |
|                    |                         |                                 |                         |                                        | Rhodobacteriales   | Rhodobacteraceae                                                                                                                                                                                                                                          | <i>Paracoccus</i>       | 89                                 |                                                                                                                                                                                                                | 1                                                                                                                                                                                                                                            | 1229                        | 1.46 % | 1     | 3 %  |      |
|                    |                         |                                 |                         |                                        |                    | Rickettsiales                                                                                                                                                                                                                                             | Anaplasmataceae         | <b>Candidatus Neoehrlichia</b>     | 100                                                                                                                                                                                                            | Causes anaplasmosis in humans and domestic animals, carried by a diverse array of rodents as well as <i>Ixodes</i> tick vectors. 100% sequence identity to <i>Candidatus N. mukarensis</i> .                                                 | 1                           | 18358  | 0     | 8    | 99 % |
|                    |                         |                                 |                         |                                        |                    |                                                                                                                                                                                                                                                           | Rickettsiaceae          | <b>Orientia</b>                    | 100                                                                                                                                                                                                            | The only species in this order, <i>Orientia tsutsugamushi</i> , causes scrub typhus in humans and is transmitted by chiggers.                                                                                                                | 1                           | 876    | 0     | 8    | 91 % |
|                    |                         |                                 |                         |                                        |                    |                                                                                                                                                                                                                                                           |                         | <b>Rickettsia</b>                  | 100                                                                                                                                                                                                            | Closest sequence identities (98%) were to the spotted fever group of <i>Rickettsia</i> species, responsible for a number of important vector-transmitted human and animal diseases.                                                          | 1                           | 57226  | 0     | 8    | 99 % |
|                    |                         |                                 |                         |                                        |                    | Sphingomonadales                                                                                                                                                                                                                                          | Sphingomonadaceae       | <i>Novosphingobium</i>             | 95                                                                                                                                                                                                             | The Sphingomonads have been implicated in nosocomial infections, but are widely distributed in nature with a diverse array of biological characteristics. However, in our dataset, positive results appeared more likely to be contaminants. | 1                           | 235    | 0     | 1    | 8 %  |
|                    |                         |                                 |                         |                                        |                    |                                                                                                                                                                                                                                                           |                         | <i>Sphingobium</i>                 | 100                                                                                                                                                                                                            |                                                                                                                                                                                                                                              | 1                           | 574    | 0     | 2    | 34 % |
|                    |                         |                                 |                         |                                        |                    |                                                                                                                                                                                                                                                           |                         | <i>Sphingomonas</i>                | 100                                                                                                                                                                                                            |                                                                                                                                                                                                                                              | 1                           | 593    | 0     | 1    | 31 % |
|                    |                         |                                 |                         |                                        | Betaproteobacteria | Burkholderiales                                                                                                                                                                                                                                           | Burkholderiaceae        | <i>Lautropia</i>                   | 100                                                                                                                                                                                                            | Though some <i>Burkholderiaceae</i> are well-known pathogens (e.g., whooping cough agent <i>Bordetella pertussis</i> ), this is not expected for any of the <i>Burkholderiales</i> found in our study.                                       | 1                           | 58     | 0     | 1    | 71 % |
|                    |                         |                                 |                         |                                        |                    |                                                                                                                                                                                                                                                           |                         | <i>Ralstonia*</i>                  | 97                                                                                                                                                                                                             |                                                                                                                                                                                                                                              | 1                           | 1624   | 0     | 2    | 4 %  |
|                    |                         |                                 |                         |                                        |                    |                                                                                                                                                                                                                                                           | Comamonadaceae          | <i>unclassified Comamonadaceae</i> | 100                                                                                                                                                                                                            |                                                                                                                                                                                                                                              | 1                           | 3407   | < 1 % | 7    | 17 % |
|                    |                         |                                 | Oxalobacteraceae        | <i>Duganella</i>                       | 65                 |                                                                                                                                                                                                                                                           | 1                       | 266                                | 0                                                                                                                                                                                                              | 2                                                                                                                                                                                                                                            | 39 %                        |        |       |      |      |
|                    | Hydrogenophilales       | Hydrogenophilaceae              | Hydrogenophilus         | <i>unclassified Neisseriaceae</i>      | 100                | Among the remaining Betaproteobacteria, the only recognized pathogenic species are a few of many in the genus <i>Neisseria</i> . One infection carrying the bulk of reads shared 98% sequence identity to bacteria found in healthy human nasal passages. | 1                       | 2617                               | 2.98 %                                                                                                                                                                                                         | 1                                                                                                                                                                                                                                            | 6 %                         |        |       |      |      |
|                    |                         | Neisseriales                    | Neisseriaceae           | <b>Neisseriaceae</b>                   | 97                 |                                                                                                                                                                                                                                                           | 2                       | 928                                | 0                                                                                                                                                                                                              | 2                                                                                                                                                                                                                                            | 95 %                        |        |       |      |      |
|                    |                         | Rhodocyclales                   | Rhodocyclaceae          | <i>Dechloromonas</i>                   | 94                 |                                                                                                                                                                                                                                                           | 1                       | 302                                | 0                                                                                                                                                                                                              | 1                                                                                                                                                                                                                                            | 95 %                        |        |       |      |      |
|                    |                         | unclassified Betaproteobacteria |                         | <i>unclassified Betaproteobacteria</i> | 100                |                                                                                                                                                                                                                                                           | 1                       | 143                                | 1.4 %                                                                                                                                                                                                          | 1                                                                                                                                                                                                                                            | 8 %                         |        |       |      |      |

| Phylum                     | Class                 | (sub-)Order         | Family                | Genus                 | Minimum Bootstrap    | Biology                                                                                                                                                   | Nb of OTUs                                                                                                                                                                                                                                                                                        | Total Nb Reads (incl. NCs) | % reads in NC | Nb Positive Infections | % Reads in Positive Animals |      |
|----------------------------|-----------------------|---------------------|-----------------------|-----------------------|----------------------|-----------------------------------------------------------------------------------------------------------------------------------------------------------|---------------------------------------------------------------------------------------------------------------------------------------------------------------------------------------------------------------------------------------------------------------------------------------------------|----------------------------|---------------|------------------------|-----------------------------|------|
| Proteobacteria (continued) | Deltaproteobacteria   | Desulfovibrionales  | Desulfovibrionaceae   | Desulfovibrio         | 74                   | <i>Deltaproteobacteria</i> live in extreme environments, and only one pathogenic species is currently known ( <i>Lawsonia intercellularis</i> in horses). | 8                                                                                                                                                                                                                                                                                                 | 1690                       | 0             | 22                     | 78 %                        |      |
|                            |                       |                     |                       | <i>unclassified</i>   | 61                   |                                                                                                                                                           | 5                                                                                                                                                                                                                                                                                                 | 962                        | 0             | 10                     | 72 %                        |      |
|                            |                       |                     |                       | <i>unclassified</i>   | 100                  |                                                                                                                                                           | 1                                                                                                                                                                                                                                                                                                 | 52                         | 0             | 1                      | 100 %                       |      |
|                            | Epsilonproteobacteria | Campylobacterales   | Campylobacteraceae    | Arcobacter            | Arcobacter           | 100                                                                                                                                                       | Very little is known about the Arcobacter species, but their potential for pathogenicity in animals has been recently described (Houf & Stephan 2007). We noted 100% sequence homology to <i>Arcobacter cryaerophilus</i> , which has been associated with disease in humans and laboratory rats. | 1                          | 403           | 0                      | 2                           | 85 % |
|                            |                       |                     |                       |                       | Helicobacter         | 100                                                                                                                                                       |                                                                                                                                                                                                                                                                                                   | 5                          | 47394         | 0                      | 56                          | 93 % |
|                            | Gammaproteobacteria   | Alteromonadales     | Pseudoalteromonadales | Pseudoalteromonadales | Pseudoalteromonas    | 100                                                                                                                                                       | Marine bacteria.                                                                                                                                                                                                                                                                                  | 1                          | 116           | 0                      | 1                           | 32 % |
|                            |                       |                     |                       |                       | Shewanella           | 100                                                                                                                                                       |                                                                                                                                                                                                                                                                                                   | 1                          | 78            | 0                      | 1                           | 23 % |
|                            |                       | Enterobacteriales   | Enterobacteriaceae    | Escherichia-Shigella  | Escherichia-Shigella | 91                                                                                                                                                        | 1                                                                                                                                                                                                                                                                                                 | 979                        | 3.17 %        | 2                      | 29 %                        |      |
|                            |                       |                     |                       |                       | Providencia          | 96                                                                                                                                                        | 1                                                                                                                                                                                                                                                                                                 | 600                        | 0             | 1                      | 88 %                        |      |
|                            |                       | Yersinia            | Yersinia              | 85                    | 1                    | 7414                                                                                                                                                      | 0                                                                                                                                                                                                                                                                                                 | 14                         | 85 %          |                        |                             |      |
|                            |                       |                     | <i>unclassified</i>   | 93                    | 1                    | 964                                                                                                                                                       | 0                                                                                                                                                                                                                                                                                                 | 3                          | 50 %          |                        |                             |      |
|                            |                       | Legionellales       | Coxiellaceae          | Rickettsiella         | 76                   | 1                                                                                                                                                         | 592                                                                                                                                                                                                                                                                                               | 0                          | 3             | 45 %                   |                             |      |
|                            |                       | Oceanospirillales   | Oceanospirillaceae    | Marinospirillum       | 100                  | 1                                                                                                                                                         | 263                                                                                                                                                                                                                                                                                               | 0                          | 1             | 97 %                   |                             |      |
|                            |                       | Pasteurellales      | Pasteurellaceae       | <i>unclassified</i>   | 81                   | 2                                                                                                                                                         | 1951                                                                                                                                                                                                                                                                                              | 0                          | 5             | 54 %                   |                             |      |
|                            |                       | Pseudomonadales     | Moraxellaceae         | Acinetobacter         | Acinetobacter        | 97                                                                                                                                                        | Among the <i>Pseudomonadales</i> , the <i>Pseudomonas</i> (nosocomial superbug) and <i>Psychrobacter</i> (endocarditis-causing) species have the largest implications for pathogenicity. However, along with <i>Acinetobacter</i> , disease is mostly limited to opportunistic infection.         | 4                          | 11290         | 2.3 %                  | 14                          | 32 % |
|                            | Alkanindiges          |                     |                       |                       | 100                  | 1                                                                                                                                                         |                                                                                                                                                                                                                                                                                                   | 184                        | 0             | 1                      | 9 %                         |      |
|                            | Enhydrobacter         |                     |                       |                       | 100                  | 1                                                                                                                                                         |                                                                                                                                                                                                                                                                                                   | 8497                       | 1.06 %        | 1                      | 7 %                         |      |
|                            | Psychrobacter         |                     |                       |                       | 100                  | 3                                                                                                                                                         |                                                                                                                                                                                                                                                                                                   | 1033                       | < 0.1 %       | 5                      | 62 %                        |      |
|                            | <i>unclassified</i>   |                     |                       |                       | 100                  | 2                                                                                                                                                         |                                                                                                                                                                                                                                                                                                   | 18473                      | 1.72 %        | 20                     | 56 %                        |      |
|                            | Vibrionales           | Vibrionaceae        | Vibrio                | Vibrio                | 96                   | 1                                                                                                                                                         | 182                                                                                                                                                                                                                                                                                               | 0                          | 2             | 64 %                   |                             |      |
|                            |                       |                     |                       | <i>unclassified</i>   | 100                  | 1                                                                                                                                                         | 63                                                                                                                                                                                                                                                                                                | 0                          | 1             | 76 %                   |                             |      |
|                            | Xanthomonadales       | Xanthomonadaceae    | Stenotrophomonas      | 100                   | 1                    | 1123                                                                                                                                                      | 0                                                                                                                                                                                                                                                                                                 | 2                          | 14 %          |                        |                             |      |
|                            | <i>unclassified</i>   | <i>unclassified</i> | <i>unclassified</i>   | 100                   | 1                    | 63                                                                                                                                                        | 0                                                                                                                                                                                                                                                                                                 | 1                          | 76 %          |                        |                             |      |

| Phylum                                | Class                       | (sub-)Order        | Family                          | Genus                                  | Minimum Bootstrap  | Biology                                                                                                                                                                                                                                                                                                                                                                                                                  | Nb of OTUs                                                                                                                                                                                                                                                                                                                                                                                                                                                                      | Total Nb Reads (incl. NCs) | % reads in NC | Nb Positive Infections | % Reads in Positive Animals |       |
|---------------------------------------|-----------------------------|--------------------|---------------------------------|----------------------------------------|--------------------|--------------------------------------------------------------------------------------------------------------------------------------------------------------------------------------------------------------------------------------------------------------------------------------------------------------------------------------------------------------------------------------------------------------------------|---------------------------------------------------------------------------------------------------------------------------------------------------------------------------------------------------------------------------------------------------------------------------------------------------------------------------------------------------------------------------------------------------------------------------------------------------------------------------------|----------------------------|---------------|------------------------|-----------------------------|-------|
| Proteobacteria (continued)            | unclassified Proteobacteria |                    |                                 | <i>unclassified Proteobacteria</i>     | 100                | Unknown                                                                                                                                                                                                                                                                                                                                                                                                                  | 4                                                                                                                                                                                                                                                                                                                                                                                                                                                                               | 970                        | 0             | 7                      | 68 %                        |       |
| Spirochaetae                          | Spirochaetes                | Spirochaetales     | Brevinemataceae                 | <b>Brevinema</b>                       | 100                | 96% sequence identity to <i>Brevinema andersonii</i> , an infectious spirochaete of the short-tailed shrew and white footed mouse in North America.                                                                                                                                                                                                                                                                      | 1                                                                                                                                                                                                                                                                                                                                                                                                                                                                               | 5603                       | 0             | 3                      | 100 %                       |       |
|                                       |                             |                    | Leptospiraceae                  | <b>Leptospira</b>                      | 100                | 100% sequence identity to human pathogenic <i>Leptospira borgpetersenii</i> and <i>L. interrogans</i> ; rodents are considered the primary reservoir species                                                                                                                                                                                                                                                             | 1                                                                                                                                                                                                                                                                                                                                                                                                                                                                               | 257                        | 0             | 2                      | 95 %                        |       |
|                                       |                             |                    | Spirochaetaeae                  | <b>Borrelia</b>                        | 100                | Borrelia1: 100% sequence identity to <i>Borrelia miyamotoi</i> in humans and <i>Ixodes</i> ticks, zoonotic fever that may relapse (co-infects with but is not Lyme disease agent <i>B. burgdorferi</i> ); Borrelia2: 96% sequence identity to <i>Borrelia</i> sp. <i>Nov</i> in <i>Peromyscus leucopus</i> ; Borrelia3: positive in two animals beyond positive control reads                                            | 3                                                                                                                                                                                                                                                                                                                                                                                                                                                                               | 703                        | < 1 %         | 5                      | 90 %                        |       |
|                                       |                             |                    |                                 | <b>Treponema</b>                       | 99                 | <i>Treponema</i> species are pathogenic in humans (e.g., syphilis), but many occur in natural gut flora such as the rumen of cows. The closest sequence identity (92%) of our samples is to these non-pathogenic species, and they were found only in animals with several gut microbiota (probable contaminated dissection).                                                                                            | 2                                                                                                                                                                                                                                                                                                                                                                                                                                                                               | 985                        | 0             | 7                      | 77 %                        |       |
| Tenericutes                           | Mollicutes                  | Anaeroplasmatales  | Anaeroplasmataceae              | <b>Anaeroplasma</b>                    | 100                | Rumen microbes.                                                                                                                                                                                                                                                                                                                                                                                                          | 1                                                                                                                                                                                                                                                                                                                                                                                                                                                                               | 137                        | 0             | 1                      | 22 %                        |       |
|                                       |                             |                    | Entomoplasmatales               | Spiroplasmataceae                      | <b>Spiroplasma</b> | 100                                                                                                                                                                                                                                                                                                                                                                                                                      | 95% species identity with pathogenic <i>Spiroplasma</i> species isolated from <i>Ixodes</i> ticks, 94% identity with samples pulled from ticks on dogs ( <i>Spiroplasma eriocheiris</i> ); The pathogenicity of these species is disputed, with questions revolving around its role in transmissible spongiform encephalopathies in humans and animals. 1 animal very infected (BR10049 >2000 reads per sample), second animal low copy numbers (BR10114 <15 copies per sample) | 1                          | 4738          | 0                      | 2                           | 100 % |
|                                       |                             |                    | Mycoplasmatales                 | Mycoplasmataceae                       | <b>Mycoplasma</b>  | 100                                                                                                                                                                                                                                                                                                                                                                                                                      | <i>Mycoplasma</i> species are pathogenic in both humans and animals, implicated in respiratory and pelvic infections. Some OTUs were overlapping, and more detail is provided in the text.                                                                                                                                                                                                                                                                                      | 11                         | 1786662       | 2.56 %                 | 204                         | 99%   |
|                                       |                             |                    |                                 | <i>unclassified Mycoplasma species</i> | 100                |                                                                                                                                                                                                                                                                                                                                                                                                                          | 1                                                                                                                                                                                                                                                                                                                                                                                                                                                                               | 39767                      | 0             | 10                     | 100%                        |       |
| Verrucomicrobia                       | Spartobacteria              | Chthoniobacterales | unclassified Chthoniobacterales | <i>unclassified Chthoniobacterales</i> | 100                |                                                                                                                                                                                                                                                                                                                                                                                                                          | 1                                                                                                                                                                                                                                                                                                                                                                                                                                                                               | 786                        | 0             | 2                      | 11 %                        |       |
|                                       | Verrucomicrobiae            | Verrucomicrobiales | Verrucomicrobiaceae             | <b>Luteolibacter</b>                   | 98                 | Not pathogenic                                                                                                                                                                                                                                                                                                                                                                                                           | 1                                                                                                                                                                                                                                                                                                                                                                                                                                                                               | 147                        | 0             | 1                      | 24 %                        |       |
| <i>entirely unclassified Bacteria</i> |                             |                    |                                 |                                        | 100                | Unknown                                                                                                                                                                                                                                                                                                                                                                                                                  | 25                                                                                                                                                                                                                                                                                                                                                                                                                                                                              | 4390                       | < 1 %         | 37                     | 65 %                        |       |
| Eukaryote                             |                             |                    |                                 |                                        |                    |                                                                                                                                                                                                                                                                                                                                                                                                                          |                                                                                                                                                                                                                                                                                                                                                                                                                                                                                 |                            |               |                        |                             |       |
| Apicomplexa                           | Conoidasida                 | Eucoccidiorida     | Sarcocystidae                   | <i>unclassified Sarcocystidae</i>      | 100                | Protazoan intracellular organisms in the family Sarcocystidae cause a variety of diseases in animals and humans, such as Toxoplasmosis ( <i>Toxoplasma gondii</i> 90-96% similarity) and reproductive failure ( <i>Neospora caninum</i> 92-97% similarity). 98% sequence similarity to <i>Sarcocystis muris</i> , a coccidian parasite closely related to <i>Toxoplasma</i> and <i>Neurospora</i> , first found in mice. | 3                                                                                                                                                                                                                                                                                                                                                                                                                                                                               | 13581                      | 0             | 15                     | 95 %                        |       |

\* Indicates taxa found to be frequent contaminants of molecular biology reagents and consumables
