# Supplementary material for: Pathogen community composition and co-infection patterns in a wild community of rodents
Source: bioRxiv or medRxiv preprint supplement (doi:10.1101/2020.02.09.940494), 2023-11-14
Supplement: Supplementary file [file media-3.pdf]

Individual Animal

- Positive
- Negative
- Not tested

|                                                       | <i>Arvicola scherman</i>           | <i>Mi. agrestis</i>                | <i>Microtus arvalis</i>            |
|-------------------------------------------------------|------------------------------------|------------------------------------|------------------------------------|
| <b>Cricetidae</b>                                     |                                    |                                    |                                    |
| <b>Infection</b>                                      |                                    |                                    |                                    |
| <b>Pathogenic bases, reliably detectable</b>          |                                    |                                    |                                    |
| Bartonella                                            | <span style="color: red;">■</span> | <span style="color: red;">■</span> | <span style="color: red;">■</span> |
| Brevinema                                             | <span style="color: red;">■</span> | <span style="color: red;">■</span> | <span style="color: red;">■</span> |
| Myc01                                                 | <span style="color: red;">■</span> | <span style="color: red;">■</span> | <span style="color: red;">■</span> |
| Myc02                                                 | <span style="color: red;">■</span> | <span style="color: red;">■</span> | <span style="color: red;">■</span> |
| Myc03                                                 | <span style="color: red;">■</span> | <span style="color: red;">■</span> | <span style="color: red;">■</span> |
| Myc04                                                 | <span style="color: red;">■</span> | <span style="color: red;">■</span> | <span style="color: red;">■</span> |
| Myc05                                                 | <span style="color: red;">■</span> | <span style="color: red;">■</span> | <span style="color: red;">■</span> |
| Myc06                                                 | <span style="color: red;">■</span> | <span style="color: red;">■</span> | <span style="color: red;">■</span> |
| Myc07                                                 | <span style="color: red;">■</span> | <span style="color: red;">■</span> | <span style="color: red;">■</span> |
| Myc08                                                 | <span style="color: red;">■</span> | <span style="color: red;">■</span> | <span style="color: red;">■</span> |
| Myc09                                                 | <span style="color: red;">■</span> | <span style="color: red;">■</span> | <span style="color: red;">■</span> |
| Myc010                                                | <span style="color: red;">■</span> | <span style="color: red;">■</span> | <span style="color: red;">■</span> |
| Neohellicha                                           | <span style="color: red;">■</span> | <span style="color: red;">■</span> | <span style="color: red;">■</span> |
| Orientia                                              | <span style="color: red;">■</span> | <span style="color: red;">■</span> | <span style="color: red;">■</span> |
| Rickettsia                                            | <span style="color: red;">■</span> | <span style="color: red;">■</span> | <span style="color: red;">■</span> |
| Spiroplasma                                           | <span style="color: red;">■</span> | <span style="color: red;">■</span> | <span style="color: red;">■</span> |
| <b>Pathogenic bases, not reliably detectable</b>      |                                    |                                    |                                    |
| Arctobacter                                           | <span style="color: red;">■</span> | <span style="color: red;">■</span> | <span style="color: red;">■</span> |
| Borrelia1                                             | <span style="color: red;">■</span> | <span style="color: red;">■</span> | <span style="color: red;">■</span> |
| Borrelia2                                             | <span style="color: red;">■</span> | <span style="color: red;">■</span> | <span style="color: red;">■</span> |
| Borrelia3                                             | <span style="color: red;">■</span> | <span style="color: red;">■</span> | <span style="color: red;">■</span> |
| Leptospira                                            | <span style="color: red;">■</span> | <span style="color: red;">■</span> | <span style="color: red;">■</span> |
| Myc0771                                               | <span style="color: red;">■</span> | <span style="color: red;">■</span> | <span style="color: red;">■</span> |
| Myc0125                                               | <span style="color: red;">■</span> | <span style="color: red;">■</span> | <span style="color: red;">■</span> |
| Sarcocystides                                         | <span style="color: red;">■</span> | <span style="color: red;">■</span> | <span style="color: red;">■</span> |
| Sarcocystides2                                        | <span style="color: red;">■</span> | <span style="color: red;">■</span> | <span style="color: red;">■</span> |
| Sarcocystides3                                        | <span style="color: red;">■</span> | <span style="color: red;">■</span> | <span style="color: red;">■</span> |
| <b>Unclear pathogenicity, reliably detectable</b>     |                                    |                                    |                                    |
| Corynebacterii                                        | <span style="color: red;">■</span> | <span style="color: red;">■</span> | <span style="color: red;">■</span> |
| Dietzia                                               | <span style="color: red;">■</span> | <span style="color: red;">■</span> | <span style="color: red;">■</span> |
| Helico1                                               | <span style="color: red;">■</span> | <span style="color: red;">■</span> | <span style="color: red;">■</span> |
| Helico2                                               | <span style="color: red;">■</span> | <span style="color: red;">■</span> | <span style="color: red;">■</span> |
| Helico3                                               | <span style="color: red;">■</span> | <span style="color: red;">■</span> | <span style="color: red;">■</span> |
| Helico4                                               | <span style="color: red;">■</span> | <span style="color: red;">■</span> | <span style="color: red;">■</span> |
| Pasteurella1                                          | <span style="color: red;">■</span> | <span style="color: red;">■</span> | <span style="color: red;">■</span> |
| Pasteurella2                                          | <span style="color: red;">■</span> | <span style="color: red;">■</span> | <span style="color: red;">■</span> |
| Neisseria1                                            | <span style="color: red;">■</span> | <span style="color: red;">■</span> | <span style="color: red;">■</span> |
| Rickettsiella                                         | <span style="color: red;">■</span> | <span style="color: red;">■</span> | <span style="color: red;">■</span> |
| Streptococcus                                         | <span style="color: red;">■</span> | <span style="color: red;">■</span> | <span style="color: red;">■</span> |
| Yersinia                                              | <span style="color: red;">■</span> | <span style="color: red;">■</span> | <span style="color: red;">■</span> |
| <b>Unclear pathogenicity, not reliably detectable</b> |                                    |                                    |                                    |
| Fusobacterium                                         | <span style="color: red;">■</span> | <span style="color: red;">■</span> | <span style="color: red;">■</span> |
| Neisseria2                                            | <span style="color: red;">■</span> | <span style="color: red;">■</span> | <span style="color: red;">■</span> |
| Treponema                                             | <span style="color: red;">■</span> | <span style="color: red;">■</span> | <span style="color: red;">■</span> |
| Williamsia                                            | <span style="color: red;">■</span> | <span style="color: red;">■</span> | <span style="color: red;">■</span> |
| <b>Antibiotic antibiotics</b>                         |                                    |                                    |                                    |
| Hantavirus                                            | <span style="color: red;">■</span> | <span style="color: red;">■</span> | <span style="color: red;">■</span> |
| CPXV                                                  | <span style="color: red;">■</span> | <span style="color: red;">■</span> | <span style="color: red;">■</span> |
| LCMV                                                  | <span style="color: red;">■</span> | <span style="color: red;">■</span> | <span style="color: red;">■</span> |
| TBEV                                                  | <span style="color: red;">■</span> | <span style="color: red;">■</span> | <span style="color: red;">■</span> |

Cricetidae (cont.)

| Infection                                               |  | <i>Mi. subterraneus</i> | <i>Myodes glareolus</i> | <i>Ondatra zibethicus</i> |
|---------------------------------------------------------|--|-------------------------|-------------------------|---------------------------|
| <b>Pathogenic taxa, reliably detectable</b>             |  |                         |                         |                           |
| Bartonella                                              |  |                         |                         |                           |
| Brexitrima                                              |  |                         |                         |                           |
| Myc01                                                   |  |                         |                         |                           |
| Myc02                                                   |  |                         |                         |                           |
| Myc03                                                   |  |                         |                         |                           |
| Myc04                                                   |  |                         |                         |                           |
| Myc05                                                   |  |                         |                         |                           |
| Myc06                                                   |  |                         |                         |                           |
| Myc07                                                   |  |                         |                         |                           |
| Myc08                                                   |  |                         |                         |                           |
| Myc09                                                   |  |                         |                         |                           |
| Myc010                                                  |  |                         |                         |                           |
| Neorhithia                                              |  |                         |                         |                           |
| Orientia                                                |  |                         |                         |                           |
| Rickettsia                                              |  |                         |                         |                           |
| Spiroplasma                                             |  |                         |                         |                           |
| <b>Pathogenic taxa, not reliably detectable</b>         |  |                         |                         |                           |
| Acrobacter                                              |  |                         |                         |                           |
| Borrelia1                                               |  |                         |                         |                           |
| Borrelia2                                               |  |                         |                         |                           |
| Borrelia3                                               |  |                         |                         |                           |
| Leprosifira                                             |  |                         |                         |                           |
| Myc007/1                                                |  |                         |                         |                           |
| Myc017/5                                                |  |                         |                         |                           |
| Sarcosporidae1                                          |  |                         |                         |                           |
| Sarcosporidae2                                          |  |                         |                         |                           |
| Sarcosporidae3                                          |  |                         |                         |                           |
| <b>Uncertain pathogenicity, reliably detectable</b>     |  |                         |                         |                           |
| Corynebacterii                                          |  |                         |                         |                           |
| Derrida                                                 |  |                         |                         |                           |
| Helico1                                                 |  |                         |                         |                           |
| Helico2                                                 |  |                         |                         |                           |
| Helico3                                                 |  |                         |                         |                           |
| Helico4                                                 |  |                         |                         |                           |
| Pasteurella1                                            |  |                         |                         |                           |
| Pasteurella2                                            |  |                         |                         |                           |
| Neisseria1                                              |  |                         |                         |                           |
| Rickettsiella                                           |  |                         |                         |                           |
| Streptococcus                                           |  |                         |                         |                           |
| Yersinia                                                |  |                         |                         |                           |
| <b>Uncertain pathogenicity, not reliably detectable</b> |  |                         |                         |                           |
| Fusobacterium                                           |  |                         |                         |                           |
| Neisseria2                                              |  |                         |                         |                           |
| Treponema                                               |  |                         |                         |                           |
| Williamsia                                              |  |                         |                         |                           |
| <b>Antibiotic resistances</b>                           |  |                         |                         |                           |
| Hantavirus                                              |  |                         |                         |                           |
| CPXV                                                    |  |                         |                         |                           |
| LCMV                                                    |  |                         |                         |                           |
| TBEV                                                    |  |                         |                         |                           |

Muridae

|                                                       | Apodemus flavicollis | Apodemus sylvaticus | Rattus norvegicus | Myocastor coypus |
|-------------------------------------------------------|----------------------|---------------------|-------------------|------------------|
| <b>Pathogenic taxa, reliably detectable</b>           |                      |                     |                   |                  |
| Bartonella                                            | ■                    | ■                   | ■                 | ■                |
| Breivertella                                          | ■                    | ■                   | ■                 | ■                |
| Myco1                                                 | ■                    | ■                   | ■                 | ■                |
| Myco2                                                 | ■                    | ■                   | ■                 | ■                |
| Myco3                                                 | ■                    | ■                   | ■                 | ■                |
| Myco4                                                 | ■                    | ■                   | ■                 | ■                |
| Myco5                                                 | ■                    | ■                   | ■                 | ■                |
| Myco6                                                 | ■                    | ■                   | ■                 | ■                |
| Myco7                                                 | ■                    | ■                   | ■                 | ■                |
| Myco8                                                 | ■                    | ■                   | ■                 | ■                |
| Myco9                                                 | ■                    | ■                   | ■                 | ■                |
| Myco10                                                | ■                    | ■                   | ■                 | ■                |
| Oocystidia                                            | ■                    | ■                   | ■                 | ■                |
| Oocystidia1                                           | ■                    | ■                   | ■                 | ■                |
| Oocystidia2                                           | ■                    | ■                   | ■                 | ■                |
| Oocystidia3                                           | ■                    | ■                   | ■                 | ■                |
| Sarcosporidia                                         | ■                    | ■                   | ■                 | ■                |
| <b>Pathogenic taxa, not reliably detectable</b>       |                      |                     |                   |                  |
| Archibacter                                           |                      |                     |                   |                  |
| Borrelia1                                             |                      |                     |                   |                  |
| Borrelia2                                             |                      |                     |                   |                  |
| Borrelia3                                             |                      |                     |                   |                  |
| Leptospira                                            |                      |                     |                   |                  |
| Myco071                                               |                      |                     |                   |                  |
| Myco125                                               |                      |                     |                   |                  |
| Stenocystidia1                                        |                      |                     |                   |                  |
| Stenocystidia2                                        |                      |                     |                   |                  |
| Stenocystidia3                                        |                      |                     |                   |                  |
| <b>Unclear pathogenicity, reliably detectable</b>     |                      |                     |                   |                  |
| Corynebacterium                                       |                      |                     |                   |                  |
| Dietzia                                               |                      |                     |                   |                  |
| Helicob1                                              |                      |                     |                   |                  |
| Helicob2                                              |                      |                     |                   |                  |
| Helicob3                                              |                      |                     |                   |                  |
| Helicob4                                              |                      |                     |                   |                  |
| Pasteurella1                                          |                      |                     |                   |                  |
| Pasteurella2                                          |                      |                     |                   |                  |
| Pasteurella3                                          |                      |                     |                   |                  |
| Pasteurella4                                          |                      |                     |                   |                  |
| Streptococcus                                         |                      |                     |                   |                  |
| Yersinia                                              |                      |                     |                   |                  |
| <b>Unclear pathogenicity, not reliably detectable</b> |                      |                     |                   |                  |
| Fusobacterium                                         |                      |                     |                   |                  |
| Neisseria1                                            |                      |                     |                   |                  |
| Treponema                                             |                      |                     |                   |                  |
| Williamsia                                            |                      |                     |                   |                  |
| <b>Antibiotic resistance</b>                          |                      |                     |                   |                  |
| Fluoroquinolones                                      | ■                    | ■                   | ■                 | ■                |
| Trimethoprim                                          | ■                    | ■                   | ■                 | ■                |
| CPMV                                                  | ■                    | ■                   | ■                 | ■                |
| CGMV                                                  | ■                    | ■                   | ■                 | ■                |
| TBEV                                                  | ■                    | ■                   | ■                 | ■                |

## Summaries

| Infection                                               | Total Nb Positive Animals | NbReads PC | NbReads NC | Total NbReads minusPC | NbReads Positive Animals | % Reads in Positive Animals | Bacterial OTU |
|---------------------------------------------------------|---------------------------|------------|------------|-----------------------|--------------------------|-----------------------------|---------------|
| <b>Pathogenic taxa, reliably detectable</b>             |                           |            |            |                       |                          |                             |               |
| Bartonella                                              | 245                       | 26295      | 575        | 6327077               | 6245151                  | 99%                         | Otu00001      |
| Brevinema                                               | 3                         | 0          | 0          | 5603                  | 5597                     | 100%                        | Otu00123      |
| Myc01                                                   | 55                        | 0          | 453        | 845971                | 833501                   | 99%                         | Otu00004      |
| Myc02                                                   | 44                        | 0          | 2          | 426034                | 423543                   | 99%                         | Otu00003      |
| Myc03                                                   | 30                        | 0          | 0          | 106443                | 102028                   | 96%                         | Otu00006      |
| Myc04                                                   | 18                        | 0          | 0          | 72724                 | 72414                    | 100%                        | Otu00010      |
| Myc05                                                   | 17                        | 0          | 1          | 165095                | 164713                   | 100%                        | Otu00005      |
| Myc06                                                   | 16                        | 0          | 1          | 92237                 | 92010                    | 100%                        | Otu00007      |
| Myc07                                                   | 10                        | 0          | 0          | 39767                 | 39580                    | 100%                        | Otu00012      |
| Myc08                                                   | 9                         | 0          | 0          | 31528                 | 31448                    | 100%                        | Otu00015      |
| Myc09                                                   | 7                         | 0          | 0          | 40125                 | 39661                    | 99%                         | Otu00049      |
| Myc010                                                  | 6                         | 0          | 0          | 6086                  | 6043                     | 99%                         | Otu00054      |
| Neoehrlichia                                            | 8                         | 0          | 0          | 18358                 | 18266                    | 99%                         | Otu00039      |
| Orientia                                                | 8                         | 0          | 0          | 876                   | 799                      | 91%                         | Otu00111      |
| Rickettsia                                              | 8                         | 14872      | 0          | 57226                 | 56859                    | 99%                         | Otu00008      |
| Spiroplasma                                             | 2                         | 0          | 0          | 4738                  | 4723                     | 100%                        | Otu00093      |
| <b>Pathogenic taxa, not reliably detectable</b>         |                           |            |            |                       |                          |                             |               |
| Arcobacter                                              | 1                         | 0          | 0          | 403                   | 342                      | 85%                         | Otu00296      |
| Borrelia1                                               | 2                         | 0          | 0          | 419                   | 419                      | 100%                        | Otu00318      |
| Borrelia2                                               | 2                         | 0          | 0          | 206                   | 158                      | 77%                         | Otu00514      |
| Borrelia3                                               | 1                         | 9706       | 3          | 78                    | 53                       | 68%                         | Otu00071      |
| Leptospira                                              | 2                         | 0          | 0          | 257                   | 243                      | 95%                         | Otu01015      |
| Myc0771                                                 | 1                         | 0          | 0          | 255                   | 255                      | 100%                        | Otu00771      |
| Myc04125                                                | 1                         | 0          | 0          | 164                   | 164                      | 100%                        | Otu004125     |
| Sarcocystidae1                                          | 11                        | 0          | 0          | 8684                  | 8010                     | 92%                         | Otu00056      |
| Sarcocystidae2                                          | 1                         | 0          | 0          | 3678                  | 3657                     | 99%                         | Otu00191      |
| Sarcocystidae3                                          | 3                         | 0          | 0          | 1219                  | 1196                     | 98%                         | Otu00254      |
| <b>Uncertain pathogenicity, reliably detectable</b>     |                           |            |            |                       |                          |                             |               |
| Corynebacterium                                         | 3                         | 0          | 0          | 1853                  | 600                      | 32%                         | Otu00050      |
| Dietzia                                                 | 9                         | 73         | 0          | 2553                  | 2513                     | 98%                         | Otu00102      |
| Helico1                                                 | 17                        | 0          | 0          | 34894                 | 34678                    | 99%                         | Otu00013      |
| Helico2                                                 | 22                        | 0          | 0          | 8702                  | 6158                     | 71%                         | Otu00025      |
| Helico3                                                 | 11                        | 0          | 0          | 2303                  | 2153                     | 93%                         | Otu00087      |
| Helico4                                                 | 5                         | 0          | 0          | 1178                  | 874                      | 74%                         | Otu00128      |
| Pasteurella1                                            | 3                         | 0          | 0          | 1430                  | 801                      | 56%                         | Otu00129      |
| Pasteurella2                                            | 2                         | 0          | 0          | 521                   | 246                      | 47%                         | Otu00203      |
| Neisseria1                                              | 1                         | 0          | 0          | 780                   | 745                      | 96%                         | Otu00612      |
| Rickettsiella                                           | 3                         | 0          | 0          | 592                   | 264                      | 45%                         | Otu00187      |
| Streptococcus                                           | 8                         | 0          | 0          | 1681                  | 1324                     | 79%                         | Otu00115      |
| Yersinia                                                | 14                        | 6          | 0          | 7414                  | 6295                     | 85%                         | Otu00041      |
| <b>Uncertain pathogenicity, not reliably detectable</b> |                           |            |            |                       |                          |                             |               |
| Fusobacterium                                           | 2                         | 0          | 0          | 108                   | 101                      | 94%                         | Otu00791      |
| Neisseria2                                              | 1                         | 0          | 0          | 148                   | 132                      | 89%                         | Otu00454      |
| Treponema                                               | 2                         | 0          | 0          | 348                   | 127                      | 36%                         | Otu00235      |
| Williamsia                                              | 2                         | 0          | 0          | 274                   | 148                      | 54%                         | Otu00614      |
| <b>Antiviral antibodies</b>                             |                           |            |            |                       |                          |                             |               |
| Hantavirus                                              | 16                        |            |            |                       |                          |                             |               |
| CPXV                                                    | 222                       |            |            |                       |                          |                             |               |
| LCMV                                                    | 2                         |            |            |                       |                          |                             |               |
| TBEV                                                    | 0                         |            |            |                       |                          |                             |               |
